# Supplementary material for: Pesticide pollution in freshwater paves the way for schistosomiasis transmission
Source: Springer Nature journal article supplement (doi:10.1038/s41598-020-60654-7), 2020-02-27
Supplement: MOESM1 [file 41598_2020_60654_MOESM1_ESM.pdf]

# Supplementary Information

## Pesticide pollution in freshwater paves the way for schistosomiasis transmission

Jeremias M. Becker<sup>1,2</sup>, Akbar A. Ganatra<sup>3,4\*</sup>, Faith Kandie<sup>2,3</sup>, Lina Mühlbauer<sup>1,5</sup>, Jörg Ahlheim<sup>1</sup>, Werner Brack<sup>1,2</sup>, Baldwyn Torto<sup>3</sup>, Eric L. Agola<sup>6,7</sup>, Francis McOdimba<sup>3,4</sup>, Henner Hollert<sup>2,8</sup>, Ulrike Fillinger<sup>3\*</sup>, Matthias Liess<sup>1,2\*</sup>

Shared first authorship of Becker JM and Ganatra AA

<sup>1</sup>Helmholtz Centre for Environmental Research – UFZ, Department System-Ecotoxicology, Permoserstrasse 15, 04318 Leipzig, Germany

<sup>2</sup>RWTH Aachen University, Department of Ecosystem Analysis, Institute for Environmental Research, Worringerweg 1, 52074 Aachen, Germany

<sup>3</sup>International Centre of Insect Physiology and Ecology (*icipe*), Human Health department, 00100 Nairobi, Kenya

<sup>4</sup>Egerton University, Biological sciences, P.O Box 536 Egerton, Kenya, 20115

<sup>5</sup>Ruprecht-Karl-University of Heidelberg, Faculty of Biosciences, Im Neuenheimer Feld 234, 69120 Heidelberg, Germany

<sup>6</sup>Centre for Biotechnology Research and Development, Kenya Medical Research institute (KEMRI), P.O. Box 54840-00200, Nairobi

<sup>7</sup>The Technical University of Kenya P.O. Box 52428 - 00200 Nairobi, Kenya

<sup>8</sup>Department Evolutionary Ecology and Environmental Toxicology, Institute of Ecology, Evolution and Diversity, Faculty Biological Sciences, Goethe University Frankfurt, Frankfurt 60438, Germany

\*Corresponding authors. E-mail address: [aganatra@icipe.org](mailto:aganatra@icipe.org); [matthias.liess@ufz.de](mailto:matthias.liess@ufz.de); [ufillinger@icipe.org](mailto:ufillinger@icipe.org)

**Table S1: Pesticides analyzed in the water samples.** The acute LC<sub>50</sub> values for *Daphnia magna*, *Chironomus sp.*, *Chironomus riparius* and *Hyalella azteca* were obtained from the PPDB and the ECOTOX data base<sup>32,58</sup>. In the PPDB data base LC<sub>50</sub> values for 48 h exposure on *Chironomus* and *D. magna* were compared and the lowest value was used. If no values were available or if the tolerance of *D. magna* was exceptionally high (neonicotinoids), LC<sub>50</sub> values for the same species or *H. azteca* were searched in the ECOTOX data base and the median value was used.

| Name                     | CAS Nr.     | Application | Class            | LC <sub>50</sub> [µg/L] | Test species       | Duration | Source |
|--------------------------|-------------|-------------|------------------|-------------------------|--------------------|----------|--------|
| 2,4-Dichlorophenox. acid | 94-75-7     | Herbicide   | Auxine           | 11,020.00               | <i>C. sp.</i>      | 48 h     | ECOTOX |
| Acetamiprid              | 135410-20-7 | Insecticide | Neonicotinoid    | 11.56                   | <i>C. riparius</i> | 96 h     | PPDB   |
| Ametryn                  | 834-12-8    | Herbicide   | Triazine         | 28,000.00               | <i>D. magna</i>    | 48 h     | PPDB   |
| Atrazine                 | 1912-24-9   | Herbicide   | Triazine         | 85,000.00               | <i>D. magna</i>    | 48 h     | PPDB   |
| Azoxystrobin             | 131860-33-8 | Fungicide   | Strobilurine     | 230.00                  | <i>D. magna</i>    | 48 h     | PPDB   |
| Bendiocarb               | 22781-23-3  | Insecticide | Carbamate        | 30.00                   | <i>D. magna</i>    | 48 h     | PPDB   |
| Carbendazim              | 10605-21-7  | Fungicide   | Carbamate        | 150.00                  | <i>D. magna</i>    | 48 h     | PPDB   |
| Chlormequat              | 999-81-5    | Herbicide   | Growth regulator | 31,700.00               | <i>D. magna</i>    | 48 h     | PPDB   |
| Chlorothalonil-4-hydroxy | 28343-61-5  | Fungicide   | Chloronitrile    | 76,000.00               | <i>C. riparius</i> | 48 h     | PPDB   |
| Desethylatrazine         | 6190-65-4   | Metabolite  | Triazine         | 5,100.00                | <i>H. azteca</i>   | 96 h     | ECOTOX |
| Desisopropylatrazine     | 1007-28-9   | Metabolite  | Triazine         | 7,200.00                | <i>H. azteca</i>   | 96 h     | ECOTOX |
| Diazinon                 | 333-41-5    | Insecticide | Organophosphate  | 1.00                    | <i>D. magna</i>    | 48 h     | PPDB   |
| Diethyltoluamid (DEET)   | 134-62-3    | Repellent   | Methylbenzamide  | 75,000.00               | <i>D. magna</i>    | 48 h     | PPDB   |
| Diuron                   | 330-54-1    | Herbicide   | Phenylurea       | 5,700.00                | <i>D. magna</i>    | 48 h     | PPDB   |

|                   |             |             |                   |            |                 |      |      |
|-------------------|-------------|-------------|-------------------|------------|-----------------|------|------|
| Dodemorph         | 1593-77-7   | Fungicide   | Morpholine        | 3,340.00   | <i>D. magna</i> | 48 h | PPDB |
| Ethofumesate      | 26225-79-6  | Herbicide   | Benzofuran        | 13,520.00  | <i>D. magna</i> | 48 h | PPDB |
| Fenuron           | 101-42-8    | Herbicide   | Acetylurea        | 502,000.00 | <i>D. magna</i> | 48 h | PPDB |
| Hexazinone        | 51235-04-2  | Herbicide   | Triazine          | 85,000.00  | <i>D. magna</i> | 48 h | PPDB |
| Icaridin          | 119515-38-7 | Repellent   |                   | 100,000.00 | <i>D. magna</i> | 48 h | PPDB |
| Imidacloprid      | 138261-41-3 | Insecticide | Neonicotinoid     | 55.00      | <i>C. sp.</i>   | 96 h | PPDB |
| MCPA              | 94-74-6     | Herbicide   | Auxine            | 190,000.00 | <i>D. magna</i> | 48 h | PPDB |
| Mepiquat          | 15302-91-7  | Herbicide   | Piperidine        | 68,500.00  | <i>D. magna</i> | 48 h | PPDB |
| Metalaxyl         | 57837-19-1  | Fungicide   | Acetylalanine     | 3,470      | <i>D. magna</i> | 48 h | PPDB |
| Metolachlor       | 51218-45-2  | Herbicide   | Chloroacetanilide | 23,500.00  | <i>D. magna</i> | 48 h | PPDB |
| Metribuzin        | 21087-64-9  | Herbicide   | Triazinone        | 49,000.00  | <i>D. magna</i> | 48 h | PPDB |
| Pirimiphos-methyl | 29232-93-7  | Insecticide | Organophosphate   | 0.21       | <i>D. magna</i> | 48 h | PPDB |
| Simazine          | 122-34-9    | Herbicide   | Triazine          | 1,100.00   | <i>D. magna</i> | 48 h | PPDB |
| Terbuthylazine    | 5915-41-3   | Herbicide   | Chlorotriazine    | 21,200.00  | <i>D. magna</i> | 48 h | PPDB |

---

**Table S2: Pesticide pollution in water samples of the study sites.** For each site, the maximum (TU<sub>max</sub>) and the summed up (TU<sub>sum</sub>) toxic unit of all analyzed substances is shown, together with the number of substances that could be detected and quantified. At sites 37 and 48 concentrations were too low to for quantification so that no TU<sub>max</sub> and TU<sub>sum</sub> could be calculated.

| Study site | Coordinates                 | TU <sub>max</sub> | TU <sub>sum</sub> | Most toxic substance | Nr. detected | Nr. quantified |
|------------|-----------------------------|-------------------|-------------------|----------------------|--------------|----------------|
| 1          | 0°34'43.43"S; 34°36'35.40"E | -3.17             | -3.17             | Bendiocarb           | 14           | 6              |
| 2          | 0°34'53.96"S; 34°32'0.10"E  | -4.44             | -4.36             | Simazine             | 15           | 4              |
| 3          | 0°28'29.67"S; 34°32'56.95"E | -2.04             | -1.89             | Bendiocarb           | 22           | 10             |
| 4          | 0°22'48.01"S; 34°38'30.92"E | -1.66             | -1.65             | Bendiocarb           | 16           | 6              |
| 5          | 0°40'50.77"S; 34°32'39.07"E | -2.30             | -2.09             | Bendiocarb           | 24           | 9              |
| 6          | 0°49'46.82"S; 34°23'44.12"E | -2.59             | -2.39             | Diazinon             | 17           | 8              |
| 7          | 0° 8'17.02"S; 34°56'8.82"E  | -2.70             | -2.63             | Diazinon             | 23           | 12             |
| 8          | 0° 8'38.67"S; 34°58'20.86"E | -1.86             | -1.85             | Pirimiphos-meth.     | 24           | 12             |
| 9          | 0°10'18.07"S; 34°54'28.44"E | -1.86             | -1.63             | Pirimiphos-meth.     | 28           | 16             |
| 10         | 0°48'19.63"S; 34°41'54.93"E | -1.21             | -1.06             | Pirimiphos-meth.     | 27           | 17             |
| 11         | 0°22'38.69"S; 34°38'6.98"E  | -1.90             | -1.89             | Bendiocarb           | 20           | 10             |
| 12         | 0°23'17.85"S; 34°38'30.02"E | -2.38             | -2.36             | Bendiocarb           | 21           | 10             |
| 13         | 0°33'40.22"S; 34°18'9.70"E  | -3.85             | -3.85             | Bendiocarb           | 16           | 4              |
| 14         | 0°29'9.67"S; 34°31'2.85"E   | -2.14             | -2.11             | Carbendazim          | 12           | 6              |
| 15         | 0°28'34.93"S; 34°32'41.36"E | -2.00             | -1.98             | Bendiocarb           | 28           | 10             |
| 16         | 0°27'5.24"S; 35°7'15.27"E   | -2.60             | -2.59             | Bendiocarb           | 18           | 4              |
| 17         | 0° 9'0.91"S; 34°55'49.30"E  | -2.58             | -2.24             | Carbendazim          | 18           | 9              |
| 18         | 0° 6'46.67"S; 34°47'29.77"E | -2.54             | -2.53             | Diazinon             | 15           | 4              |
| 19         | 0°28'38.92"S; 34°32'38.87"E | -2.25             | -2.09             | Bendiocarb           | 17           | 8              |
| 20         | 0°48'2.29"S; 34°43'45.10"E  | -2.34             | -2.34             | Diazinon             | 14           | 1              |
| 21         | 0°32'20.58"S; 35°2'0.91"E   | -2.21             | -1.92             | Diazinon             | 16           | 4              |
| 22         | 0°27'45.4"S; 34°33'55.1"E   | -2.26             | -2.25             | Diazinon             | 20           | 9              |
| 23         | 0°59'50.59"S; 34°16'55.57"E | -2.36             | -2.34             | Diazinon             | 15           | 7              |
| 24         | 0°19'20.39"S; 34°47'20.33"E | -3.07             | -3.06             | Bendiocarb           | 13           | 4              |

|    |                             |       |       |                  |    |    |
|----|-----------------------------|-------|-------|------------------|----|----|
| 25 | 0°53'54.15"S; 34°31'24.54"E | -2.46 | -2.39 | Diazinon         | 23 | 11 |
| 26 | 0°54'29.02"S; 34°33'28.89"E | -1.79 | -1.67 | Pirimiphos-meth. | 18 | 10 |
| 27 | 0°28'34.33"S; 34°31'56.51"E | -2.07 | -1.83 | Pirimiphos-meth. | 21 | 12 |
| 28 | 1° 3'53.69"S; 34°28'5.52"E  | -2.33 | -2.30 | Diazinon         | 15 | 6  |
| 29 | 0°48'31.95"S; 34°43'58.93"E | -2.17 | -2.10 | Diazinon         | 19 | 9  |
| 30 | 0°53'8.15"S; 34°31'20.35"E  | -2.29 | -2.27 | Bendiocarb       | 14 | 4  |
| 31 | 0°27'34.68"S; 34°35'40.87"E | -3.50 | -3.43 | Carbendazim      | 14 | 5  |
| 32 | 1° 1'18.24"S; 34°37'27.29"E | -2.40 | -2.39 | Diazinon         | 17 | 4  |
| 33 | 0°49'50.42"S; 34°44'44.98"E | -4.09 | -3.88 | Imidacloprid     | 19 | 8  |
| 34 | 0°49'4.79"S; 34°23'34.97"E  | -2.55 | -2.45 | Bendiocarb       | 21 | 10 |
| 35 | 0°27'47.58"S; 34°32'55.31"E | -1.89 | -1.88 | Bendiocarb       | 20 | 10 |
| 36 | 0°46'39.89"S; 34°12'21.19"E | -6.44 | -6.34 | Diethyltoluamid  | 4  | 2  |
| 37 | 0°48'47.38"S; 34°13'15.06"E | /     | /     | Ametryn          | 6  | 0  |
| 38 | 0°39'27.61"S; 34°42'37.10"E | -2.26 | -2.06 | Bendiocarb       | 16 | 8  |
| 39 | 0°39'24.17"S; 34°41'57.84"E | -2.06 | -1.98 | Diazinon         | 17 | 10 |
| 40 | 0°30'48.53"S; 34°17'29.08"E | -5.81 | -5.80 | Simazine         | 8  | 2  |
| 41 | 0°23'35.22"S; 35° 0'35.88"E | -4.94 | -4.94 | Simazine         | 8  | 1  |
| 42 | 0°59'40.04"S; 34°17'26.47"E | -3.66 | -3.66 | Bendiocarb       | 9  | 2  |
| 43 | 0°59'40.04"S; 34°17'26.47"E | -1.81 | -1.76 | Diazinon         | 23 | 15 |
| 44 | 0°59'9.30"S; 34°35'5.25"E   | -2.54 | -2.53 | Bendiocarb       | 20 | 10 |
| 45 | 0°27'5.46"S; 35°13'8.39"E   | -3.93 | -3.81 | Imidacloprid     | 10 | 3  |
| 46 | 0°29'12.72"S; 35°10'58.85"E | -2.59 | -2.24 | Diazinon         | 17 | 9  |
| 47 | 0°30'54.82"S; 35° 4'49.80"E | -2.24 | -2.23 | Diazinon         | 12 | 3  |
| 48 | 0°19'1.31"S; 35° 0'22.66"E  | /     | /     | Acetamiprid      | 1  | 0  |

---

**Table S3: Ranking of the analyzed pesticides according to the environmental toxicity observed.** The substances were ordered according to the maximum toxic unit (Max. TU) observed in water samples from all study sites. Additionally, the number of sites is reported at which a substance showed the highest toxic unit among all pesticides analyzed.

| Pesticide                      | CAS Nr.     | Application | Class           | Max. TU | Most toxic at nr. of sites | Detected at nr. of sites |
|--------------------------------|-------------|-------------|-----------------|---------|----------------------------|--------------------------|
| Pirimiphos-methyl              | 29232-93-7  | Insecticide | Organophosphate | -1.21   | 5                          | 6                        |
| Bendiocarb                     | 22781-23-3  | Insecticide | Carbamate       | -1.66   | 17                         | 31                       |
| Diazinon                       | 333-41-5    | Insecticide | Organophosphate | -1.71   | 15                         | 36                       |
| Carbendazim                    | 10605-21-7  | Insecticide | Carbamate       | -2.14   | 3                          | 46                       |
| Acetamiprid                    | 135410-20-7 | Insecticide | Neonicotinoid   | -2.80   | 0                          | 39                       |
| Imidacloprid                   | 138261-41-3 | Insecticide | Neonicotinoid   | -3.24   | 0                          | 16                       |
| Simazine                       | 122-34-9    | Herbicide   | Triazine        | -3.83   | 3                          | 46                       |
| 2,4-Dichlorophenoxyacetic acid | 94-75-7     | Herbicide   | Auxine          | -4.32   | 0                          | 48                       |
| Metalaxyl                      | 57837-19-1  | Fungicide   | Acetylalanine   | -4.40   | 0                          | 47                       |
| Dodemorph                      | 1593-77-7   | Fungicide   | Morpholine      | -4.42   | 0                          | 40                       |
| Ametryn                        | 834-12-8    | Herbicide   | Triazine        | -4.68   | 0                          | 6                        |
| Hexazinone                     | 51235-04-2  | Herbicide   | Triazine        | -4.74   | 0                          | 15                       |
| Atrazine                       | 1912-24-9   | Herbicide   | Triazine        | -4.88   | 0                          | 45                       |
| Azoxystrobin                   | 131860-33-8 | Fungicide   | Strobilurine    | -4.98   | 0                          | 32                       |

|                          |             |            |                   |       |   |    |
|--------------------------|-------------|------------|-------------------|-------|---|----|
| Ethofumesate             | 26225-79-6  | Herbicide  | Benzofuran        | -5.09 | 0 | 31 |
| Metribuzin               | 21087-64-9  | Herbicide  | Triazinone        | -5.42 | 0 | 8  |
| Desethylatrazine         | 6190-65-4   | Metabolite | Triazine          | -5.61 | 0 | 47 |
| Metolachlor              | 51218-45-2  | Herbicide  | Chloroacetanilide | -5.70 | 0 | 27 |
| Diuron                   | 330-54-1    | Herbicide  | Phenylurea        | -5.76 | 0 | 15 |
| Desisopropylatrazine     | 1007-28-9   | Metabolite | Triazine          | -5.77 | 0 | 17 |
| Terbuthylazine           | 5915-41-3   | Herbicide  | Chlorotriazine    | -5.96 | 0 | 31 |
| Mepiquat                 | 15302-91-7  | Herbicide  | Piperidine        | -6.17 | 0 | 47 |
| Icaridin                 | 119515-38-7 | Repellent  |                   | -6.17 | 0 | 47 |
| Chlormequat              | 999-81-5    | Herbicide  | Growth regulator  | -6.43 | 0 | 1  |
| Diethyltoluamid (DEET)   | 134-62-3    | Repellent  | Methylbenzamide   | -6.43 | 0 | 48 |
| MCPA                     | 94-74-6     | Herbicide  | Auxine            | -7.15 | 0 | 48 |
| Chlorothalonil-4-hydroxy | 28343-61-5  | Fungicide  | Chloronitrile     | -7.80 | 0 | 13 |
| Fenuron                  | 101-42-8    | Herbicide  | Acetylurea        | -8.38 | 0 | 47 |

---

**Table S4: Environmental effects on the incidence of schistosomiasis hosts in surface waters of the study area.** Each environmental variable was fitted using a one-way binomial GLM with cloglog-link. The unit and the transformation of each environmental variable prior to analysis is given in squared brackets. For numerical variables, model coefficients are reported together with their standard error;  $n = 48$  for each numeric model. For categorical variables, the back-transformed mean of each factor level is reported together with 95 % confidence intervals and the number of observations.  $\chi^2$  and  $p$  are reported from a likelihood ratio test against the null model without explanatory variables.

| Numerical variable                       | Intercept    | Slope          | Res. df | $\chi^2$ | $p$      |
|------------------------------------------|--------------|----------------|---------|----------|----------|
| Flow velocity [ln(m/s)]                  | -1.64 ± 0.63 | -0.02 ± 0.17   | 46      | 0.02     | 0.900    |
| Depth [ln(cm)]                           | -3.81 ± 2.65 | 0.57 ± 0.65    | 46      | 0.84     | 0.359    |
| Temperature [°C]                         | -1.50 ± 1.87 | < -0.01 ± 0.07 | 46      | < 0.01   | 0.969    |
| Conductivity [ln(μS/cm)]                 | -5.47 ± 3.07 | 0.79 ± 0.60    | 46      | 1.90     | 0.170    |
| Acidity [pH]                             | 1.65 ± 2.85  | -0.44 ± 0.39   | 46      | 1.02     | 0.312    |
| Dissolved oxygen [ln(mg/L)]              | 0.47 ± 0.70  | -1.60 ± 0.58   | 46      | 8.06     | 0.004 ** |
| Turbidity [ln(NTU)]                      | -0.92 ± 1.07 | -0.13 ± 0.20   | 46      | 0.41     | 0.520    |
| Carbonate hardness [ln(°dH)]             | -3.03 ± 1.16 | 0.89 ± 0.63    | 46      | 2.25     | 0.134    |
| NH <sub>4</sub> [mg/L]                   | -1.51 ± 0.38 | -0.88 ± 2.69   | 46      | 0.11     | 0.746    |
| PO <sub>4</sub> [mg/L]                   | -1.24 ± 0.73 | -0.02 ± 0.04   | 46      | 0.23     | 0.629    |
| NO <sub>3</sub> - [mg/L]                 | -1.13 ± 0.45 | -0.06 ± 0.05   | 46      | 1.59     | 0.207    |
| NO <sub>2</sub> - [ln(mg/L)]             | -0.72 ± 1.16 | 0.26 ± 0.35    | 46      | 0.54     | 0.463    |
| Species richness) [ln( $n$ taxa)]        | -5.29 ± 2.11 | 1.62 ± 0.86    | 46      | 4.39     | 0.036 *  |
| Evenness [J']                            | -2.07 ± 1.20 | 0.93 ± 2.14    | 46      | 0.16     | 0.688    |
| Species diversity [H']                   | -4.21 ± 1.53 | 1.64 ± 0.84    | 46      | 4.42     | 0.035 *  |
| SASS 5 [ln(ASPT)]                        | 2.12 ± 3.11  | -2.33 ± 1.99   | 46      | 1.56     | 0.211    |
| Macroinv. abund. [ln( $n$ ind.)]         | -2.47 ± 2.16 | 0.20 ± 0.48    | 46      | 0.18     | 0.672    |
| Dominance predators [%]                  | -2.05 ± 0.95 | 0.73 ± 1.31    | 46      | 0.33     | 0.564    |
| Dominance competitors [%]                | -0.36 ± 0.45 | -4.58 ± 1.87   | 46      | 9.09     | 0.003 ** |
| Pesticide pollution [TU <sub>max</sub> ] | 2.46 ± 1.69  | 1.72 ± 0.79    | 46      | 7.60     | 0.006 ** |
| Emerged vegetation cover [%]             | -1.37 ± 0.36 | -1.73 ± 1.84   | 46      | 1.33     | 0.249    |
| Floating vegetation cover [%]            | -1.61 ± 0.35 | 0.70 ± 1.91    | 46      | 0.13     | 0.716    |
| Submerged vegetation [%]                 | -1.69 ± 0.36 | 5.65 ± 3.95    | 46      | 1.26     | 0.262    |
| Detritus cover [%]                       | -1.57 ± 0.36 | -0.03 ± 1.68   | 46      | < 0.01   | 0.984    |



| Categorical variable |                    | Mean (95 % CI)       | <i>n</i> | Res. df | $\chi^2$ | <i>p</i> |
|----------------------|--------------------|----------------------|----------|---------|----------|----------|
| Habitat:             | Main tributary     | 0.11 (0.03 – 0.38)   | 18       | 42      | 6.31     | 0.277    |
|                      | Minor tributary    | 0.40 (0.17 – 0.74)   | 10       |         |          |          |
|                      | Irrigation channel | 0.20 (0.03 – 0.79)   | 5        |         |          |          |
|                      | Oxbow lake         | < 0.01 (0.00 – 1.00) | 3        |         |          |          |
|                      | Reservoir          | 0.25 (0.07 – 0.68)   | 8        |         |          |          |
|                      | Rice field         | < 0.01 (0.00 – 1.00) | 4        |         |          |          |
| Land use:            | Natural            | 0.30 (0.11 – 0.67)   | 10       | 44      | 6.37     | 0.095    |
|                      | Agricultural       | 0.16 (0.07 – 0.34)   | 32       |         |          |          |
|                      | Semi-urban         | < 0.01 (0.00 – 1.00) | 5        |         |          |          |
|                      | Industrial         | 1 (0.00 – 1.00)      | 1        |         |          |          |
| Farm type:           | Natural            | 0.27 (0.10 – 0.63)   | 11       | 43      | 1.37     | 0.850    |
|                      | Subsistence        | 0.21 (0.07 – 0.53)   | 14       |         |          |          |
|                      | Agroforestry       | < 0.01 (0.00 – 1.00) | 1        |         |          |          |
|                      | Commercial         | 0.13 (0.04 – 0.44)   | 15       |         |          |          |
|                      | Irrigation scheme  | 0.14 (0.02 – 0.67)   | 7        |         |          |          |
| Crop type:           | Maize              | 0.15 (0.04 – 0.49)   | 13       | 35      | 3.93     | 0.415    |
|                      | Rice               | 0.09 (0.01 – 0.49)   | 11       |         |          |          |
|                      | Sugar cane         | 0.42 (0.16 – 0.83)   | 7        |         |          |          |
|                      | Tea                | 0.14 (0.02 – 0.67)   | 7        |         |          |          |
|                      | Other              | < 0.01 (0.00 – 1.00) | 2        |         |          |          |

**Table S5: Environmental effects on the population density of schistosomiasis hosts in surface waters of the study area.** Each environmental variable was fitted using a one-way GLM with a zero-truncated negative-binomial distribution and log-link. In the upper part of the table results are reported with all study sites considered where hosts snails had been found;  $n = 9$  and res. df = 7 in all models. Only those environmental variables are presented that showed a (marginally) significant effect ( $p < 0.1$ ); see Tab. S4 for a complete list of environmental variables tested and for the units of measurement. Below, effects of the same variables are shown when site 39 (with extraordinary mass development of host snails) was excluded as a highly influential outlier; here  $n = 8$  and res. df = 6 in all reported models. Model coefficients are reported together with their standard error and McFadden's pseudo- $R^2$ .  $\chi^2$  and  $p$  values are reported from a likelihood ratio test against the null model without explanatory variables

| Environmental variable      | Intercept    | Slope        | Pseudo- $R^2$ | $\chi^2$ | $p$   |    |
|-----------------------------|--------------|--------------|---------------|----------|-------|----|
| For all study sites         |              |              |               |          |       |    |
| Depth                       | 11.66 ± 3.23 | -2.26 ± 0.81 | 0.09          | 6.25     | 0.012 | *  |
| Acidity                     | 10.37 ± 1.99 | -1.09 ± 0.28 | 0.14          | 10.41    | 0.001 | ** |
| Turbidity                   | 12.60 ± 2.95 | -2.01 ± 0.60 | 0.07          | 5.00     | 0.025 | *  |
| PO <sub>4</sub>             | 4.75 ± 1.09  | -0.13 ± 0.06 | 0.04          | 2.79     | 0.095 | .  |
| Species richness            | -5.98 ± 3.74 | 3.52 ± 1.49  | 0.06          | 4.47     | 0.034 | *  |
| Evenness                    | 5.96 ± 1.33  | -6.23 ± 2.41 | 0.06          | 4.02     | 0.045 | *  |
| Macroinvertebrate abundance | -3.92 ± 2.36 | 1.43 ± 0.50  | 0.11          | 7.90     | 0.005 | ** |
| Dominance predators         | 5.49 ± 0.84  | -4.39 ± 1.21 | 0.13          | 9.08     | 0.003 | ** |
| Dominance competitors       | 1.52 ± 0.59  | 6.94 ± 2.68  | 0.09          | 6.22     | 0.013 | *  |
| Without site 39             |              |              |               |          |       |    |
| Depth                       | 2.93 ± 3.39  | -0.19 ± 0.82 | < 0.01        | 0.03     | 0.871 |    |
| Acidity                     | 7.55 ± 6.72  | -0.72 ± 0.90 | 0.01          | 0.72     | 0.395 |    |
| Turbidity                   | 5.73 ± 1.43  | -0.73 ± 0.29 | 0.09          | 4.50     | 0.034 | *  |
| PO <sub>4</sub>             | 2.83 ± 0.58  | -0.04 ± 0.03 | 0.03          | 1.73     | 0.188 |    |
| Species richness            | -0.80 ± 2.54 | 1.22 ± 1.04  | 0.02          | 1.16     | 0.281 |    |
| Evenness                    | 3.21 ± 0.86  | -1.94 ± 1.50 | 0.02          | 1.07     | 0.302 |    |
| Macroinvertebrate abundance | -0.83 ± 1.83 | 0.68 ± 0.41  | 0.04          | 2.27     | 0.132 |    |
| Dominance predators         | 3.65 ± 1.02  | -2.10 ± 1.37 | 0.05          | 2.33     | 0.127 |    |
| Dominance competitors       | 2.16 ± 0.51  | 0.02 ± 3.17  | < 0.01        | < 0.01   | 0.996 |    |

**Table S6: Classification of macroinvertebrate taxa in relation to the host snails of schistosomiasis.**

| Order         | Family              | Feeding type               | Relation to snails   |
|---------------|---------------------|----------------------------|----------------------|
| Ephemeroptera | Baetidae            | Grazer                     | Competitor           |
| Ephemeroptera | Caenidae            | Grazer                     | Competitor           |
| Ephemeroptera | Ephemeridae         | Grazer                     | Competitor           |
| Ephemeroptera | Heptageniidae       | Grazer                     | Competitor           |
| Ephemeroptera | Leptophlebiidae     | Grazer                     | Competitor           |
| Ephemeroptera | Oligoneuridae       | Grazer                     | Competitor           |
| Ephemeroptera | Polymitarcyidae     | Grazer                     | Competitor           |
| Ephemeroptera | Prosopistomatidae   | Grazer                     | Competitor           |
| Ephemeroptera | Teloganodidae       | Grazer                     | Competitor           |
| Plecoptera    | Perlidae            | Predator                   | Predator             |
| Trichoptera   | Ecnomidae           | Predator, Grazer           | Predator, Competitor |
| Trichoptera   | Hydropsychidae      | Filterer                   | Other                |
| Trichoptera   | Pisuliidae          | Grazer                     | Competitor           |
| Trichoptera   | Polycentropodidae   | Filterer                   | Other                |
| Zygoptera     | Chlorocyphidae      | Predator                   | Predator             |
| Zygoptera     | Chlorolestidae      | Predator                   | Predator             |
| Zygoptera     | Coenagriidae        | Predator                   | Predator             |
| Zygoptera     | Lestidae            | Predator                   | Predator             |
| Anisoptera    | Aeshnidae           | Predator                   | Predator             |
| Anisoptera    | Corduliidae         | Predator                   | Predator             |
| Anisoptera    | Gomphidae           | Predator                   | Predator             |
| Anisoptera    | Libellulidae        | Predator                   | Predator             |
| Heteroptera   | Belostomatidae      | Predator                   | Predator             |
| Heteroptera   | Corixidae           | Predator, Grazer           | Predator, Competitor |
| Heteroptera   | Gerridae            | Predator                   | Predator             |
| Heteroptera   | Hydrometridae       | Predator                   | Predator             |
| Heteroptera   | Naucoridae          | Predator                   | Predator             |
| Heteroptera   | Nepidae             | Predator                   | Predator             |
| Heteroptera   | Notonectidae        | Predator                   | Predator             |
| Heteroptera   | Veliidae            | Predator                   | Predator             |
| Coleoptera    | Dytiscidae          | Predator                   | Predator             |
| Coleoptera    | Elmidae / Dryopidae | Grazer                     | Competitor           |
| Coleoptera    | Gyrinidae           | Predator                   | Predator             |
| Coleoptera    | Haliplidae          | Predator, Plant sucker     | Predator, Other      |
| Coleoptera    | Hydrophilidae       | Predator                   | Predator             |
| Coleoptera    | Noteridae           | Predator                   | Predator             |
| Coleoptera    | Scirtidae           | Predator                   | Predator             |
| Diptera       | Chironomidae        | Filterer, Grazer           | Other                |
| Diptera       | Culicidae           | Filterer, Grazer           | Competitor, Other    |
| Diptera       | Muscidae            | Predator                   | Predator             |
| Diptera       | Simuliidae          | Filterer                   | Other                |
| Diptera       | Tipulidae           | Shredder                   | Other                |
| Lepidoptera   | Pyralidae           | Herbivor                   | Competitor           |
| Crustacea     | Atyidae             | Grazer, Filterer           | Competitor           |
| Gastropoda    | Ampulariidae        | Grazer, Herbivor, Predator | Snail                |
| Gastropoda    | Ancylidae           | Grazer                     | Snail                |
| Gastropoda    | Hydrobiidae         | Grazer                     | Snail                |
| Gastropoda    | Lymnaeidae          | Grazer, Herbivor           | Snail                |
| Gastropoda    | Physidae            | Grazer                     | Snail                |
| Gastropoda    | Planorbidae         | Grazer, Herbivor           | Snail                |
| Gastropoda    | Thiaridae           | Grazer                     | Snail                |
| Gastropoda    | Viviparidae         | Grazer                     | Snail                |
| Annelida      | Hirudinea           | Predator                   | Predator             |
| Annelida      | Oligochaeta         | Detritivor                 | Other                |
